# Supplementary material for: A theoretical study on the size-dependence of ground-state proton transfer in phenol–ammonia clusters
Source: Royal Society of Chemistry journal article supplement (doi:10.1039/c7cp05247b), 2017-10-27
Supplement: c7cp05247b1.pdf [file c7cp05247b1.pdf]

## ***Electronic supplementary information***

### **Contents**

**Table S1** Calculated values of the shortest distance ( $r_s$ ) between the benzene ring of phenol (PhOH) and hydrogen atoms of solvents of PhOH-(NH<sub>3</sub>)<sub>n</sub> ( $n = 5-10$ ) in S<sub>0</sub>.

**Fig. S1-S6** Calculated structures of PhOH-(NH<sub>3</sub>)<sub>n</sub> ( $n = 0-8$ ) in S<sub>0</sub> optimized at the M06-2X/cc-pVTZ level of theory.

**Fig. S7-S10** Theoretical IR spectra in the mid-IR region for the PT and non-PT type structures of PhOH-(NH<sub>3</sub>)<sub>n</sub> ( $n = 5-8$ ) in S<sub>0</sub> obtained at the M06-2X/cc-pVTZ level of theory.

**Fig. S11** Pictures of normal mode vibrations for  $\nu_{12}$ ,  $\nu_2$  (NH<sub>3</sub> moiety), and  $\nu_{9a}$  modes of the most stable isomer IXa of PhOH-(NH<sub>3</sub>)<sub>9</sub> in S<sub>0</sub> calculated at the M06-2X/cc-pVTZ level.

**Fig. S12** Comparison of experimental and theoretical IR spectra of PhOH-(NH<sub>3</sub>)<sub>9</sub> in S<sub>0</sub> in the skeletal vibration region.

**Table S1** Calculated values of the shortest distance ( $r_s$ ) from the benzene ring of PhOH to hydrogen atoms of solvents of PhOH-(NH<sub>3</sub>)<sub>n</sub> ( $n = 5-10$ ) in S<sub>0</sub>. Values of the PT-type isomers are indicated by “PT” after the values. Values of structures that do not follow the threshold behavior are given in parentheses, see main text.

| isomer | $r_s / \text{\AA}$ |
|--------|--------------------|--------|--------------------|--------|--------------------|--------|--------------------|--------|--------------------|--------|--------------------|
| Va     | 2.70               | VIa    | 2.59               | VIIa   | 2.63               | VIIIa  | 2.64               | IXa    | 2.35 PT            | Xa     | 2.30 PT            |
| Vb     | 2.60               | VIb    | 2.64               | VIIb   | 2.65               | VIIIb  | 2.73               | IXb    | 2.66               | Xb     | 2.32 PT            |
| Vc     | 2.62               | VIc    | 2.64               | VIIc   | 2.63               | VIIIc  | 2.63               | IXc    | 2.28 PT            | Xc     | 2.61               |
| Vd     | 2.63               | VId    | 2.68               | VIIId  | 2.28 PT            | VIIIId | 2.25 PT            | IXd    | 2.30 PT            | Xd     | 2.51 PT            |
| Ve     | 2.67               | VIe    | 2.69               | VIIe   | 2.63               | VIIIe  | 2.31 PT            | IXe    | 2.48 PT            | Xe     | 2.63               |
| Vf     | 2.70               | VIIf   | 2.65               | VIIIf  | 2.63               | VIIIIf | 2.25 PT            | IXf    | 2.64               | Xf     | 2.67               |
| Vg     | 2.68               | VIg    | 2.66               | VIIg   | 2.66               | VIIIg  | 2.45 PT            | IXg    | 2.63               | Xg     | 2.32 PT            |
| Vh     | 2.71               | VIh    | 2.71               | VIIh   | 2.60               | VIIIh  | 2.28 PT            | IXh    | 2.59               | Xh     | 2.51 PT            |
| Vi     | 2.67               | VIi    | 2.69               | VIIi   | 2.61               | VIIIi  | 2.45 PT            | IXi    | 2.21 PT            | Xi     | 2.32 PT            |
| Vj     | 2.64               | VIj    | 2.73               | VIIj   | 2.34 PT            | VIIIj  | 2.32 PT            | IXj    | 2.72               | Xj     | 2.52 PT            |
| Vk     | 2.66               | VIk    | 2.65               | VIIk   | 2.34 PT            | VIIIk  | 2.24 PT            | IXk    | 2.69               | Xk     | 2.33 PT            |
| VI     | (2.62 PT)          | VII    | 2.66               | VIII   | (2.54)             | VIII   | 2.68               | IXl    | 2.29 PT            | Xl     | 2.28 PT            |
|        |                    | VIIm   | 2.79               | VIIIm  | 2.22 PT            | VIIIIm | 2.62               | IXm    | 2.25 PT            | Xm     | 2.29 PT            |
|        |                    | VIIn   | 2.62               | VIIIn  | 2.49 PT            | VIIIIn | 2.26 PT            | IXn    | 2.62               | Xn     | 2.52 PT            |
|        |                    | VIlo   | 2.21 PT            | VIIlo  | 2.53 PT            | VIIIlo | 2.51 PT            | IXo    | 2.34 PT            | Xo     | 2.29 PT            |
|        |                    | VIp    | 2.25 PT            |        |                    | VIIIp  | 2.26 PT            | IXp    | 2.62               |        |                    |
|        |                    | VIq    | 2.68               |        |                    | VIIIq  | 2.69               | IXq    | 2.70               |        |                    |
|        |                    | VIr    | 2.27 PT            |        |                    | VIIIr  | 2.35 PT            | IXr    | 2.56 PT            |        |                    |
|        |                    | VIIs   | 2.27 PT            |        |                    | VIIIs  | 2.63               |        |                    |        |                    |
|        |                    | VIIt   | 2.54 PT            |        |                    | VIIIIt | 2.23 PT            |        |                    |        |                    |
|        |                    | VIlu   | 2.56 PT            |        |                    | VIIIlu | 2.28 PT            |        |                    |        |                    |
|        |                    | VIv    | 2.43 PT            |        |                    |        |                    |        |                    |        |                    |
|        |                    | VIw    | 2.57 PT            |        |                    |        |                    |        |                    |        |                    |
|        |                    | VIx    | (2.60 PT)          |        |                    |        |                    |        |                    |        |                    |

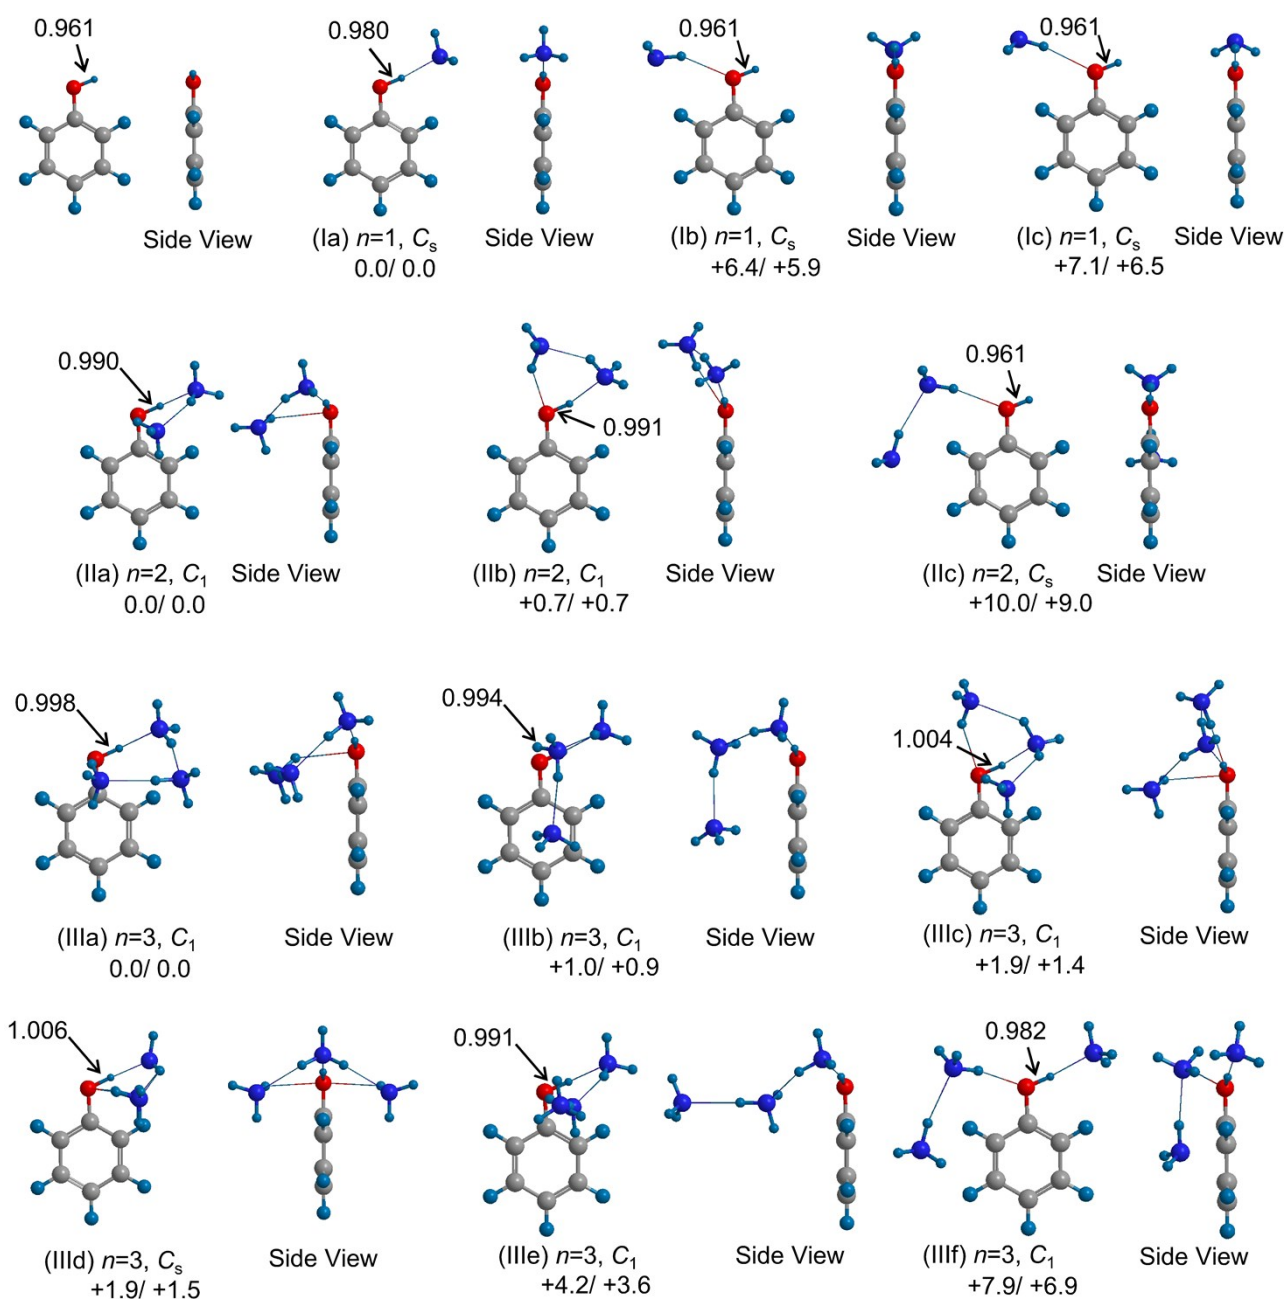

**Fig. S1** Calculated structures of  $\text{PhOH}-(\text{NH}_3)_n$  ( $n = 0-3$ ) in  $S_0$  optimized at the M06-2X/cc-pVTZ level of theory. The OH distances are given in Angstrom. Molecular symmetry and relative energies (kcal/mol) without and with the ZPE correction are given under each structure.

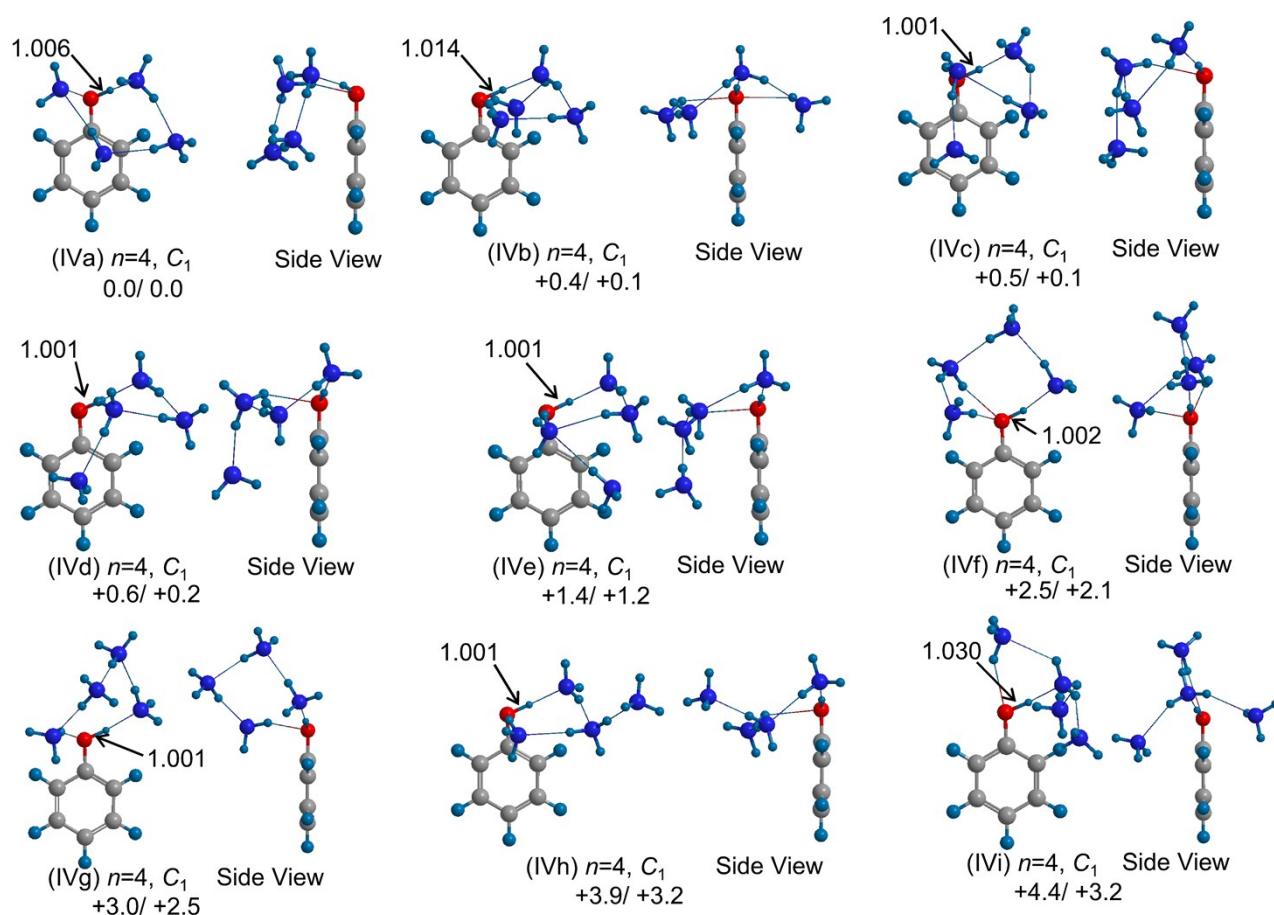

**Fig. S2** Calculated structures of  $\text{PhOH}-(\text{NH}_3)_4$  in  $S_0$  optimized at the M06-2X/cc-pVTZ level of theory. The OH distances are given in Angstrom. Molecular symmetry and relative energies (kcal/mol) without and with the ZPE correction are given under each structure.

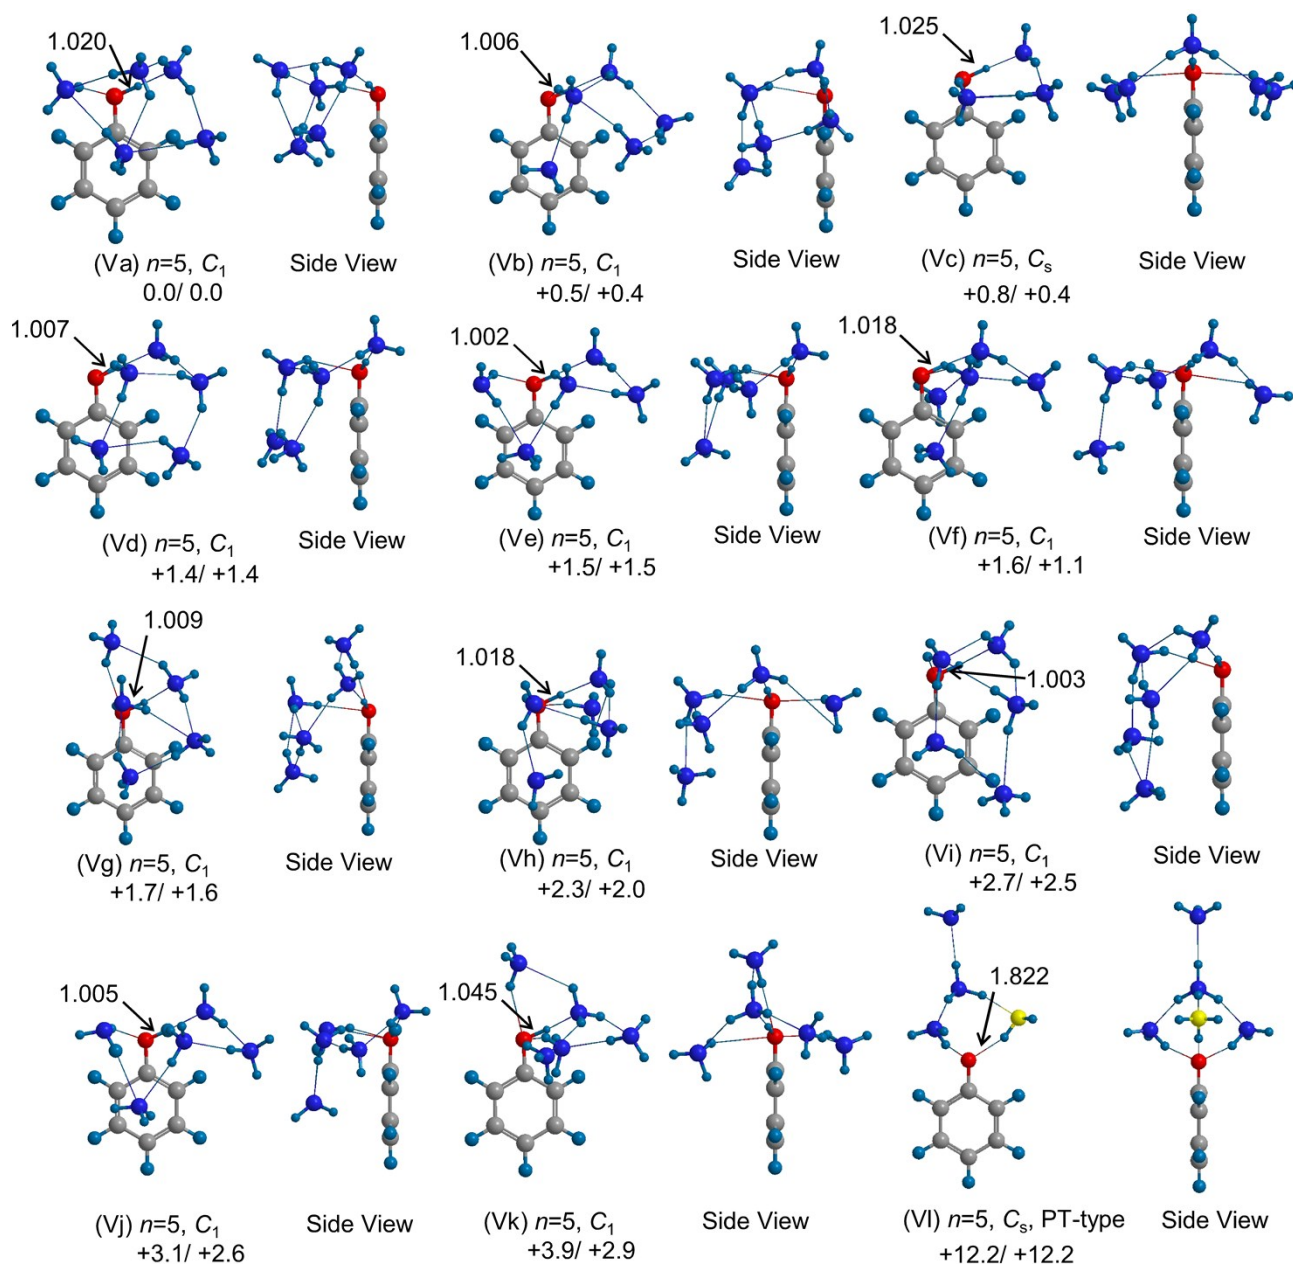

**Fig. S3** Calculated structures of  $\text{PhOH}-(\text{NH}_3)_5$  in  $S_0$  optimized at the M06-2X/cc-pVTZ level of theory. The OH distances are given in Angstrom. Molecular symmetry and relative energies (kcal/mol) without and with the ZPE correction are given under each structure. The nitrogen atom of  $\text{NH}_4^+$  in the PT type structures is marked yellow to distinguish it from  $\text{NH}_3$ .



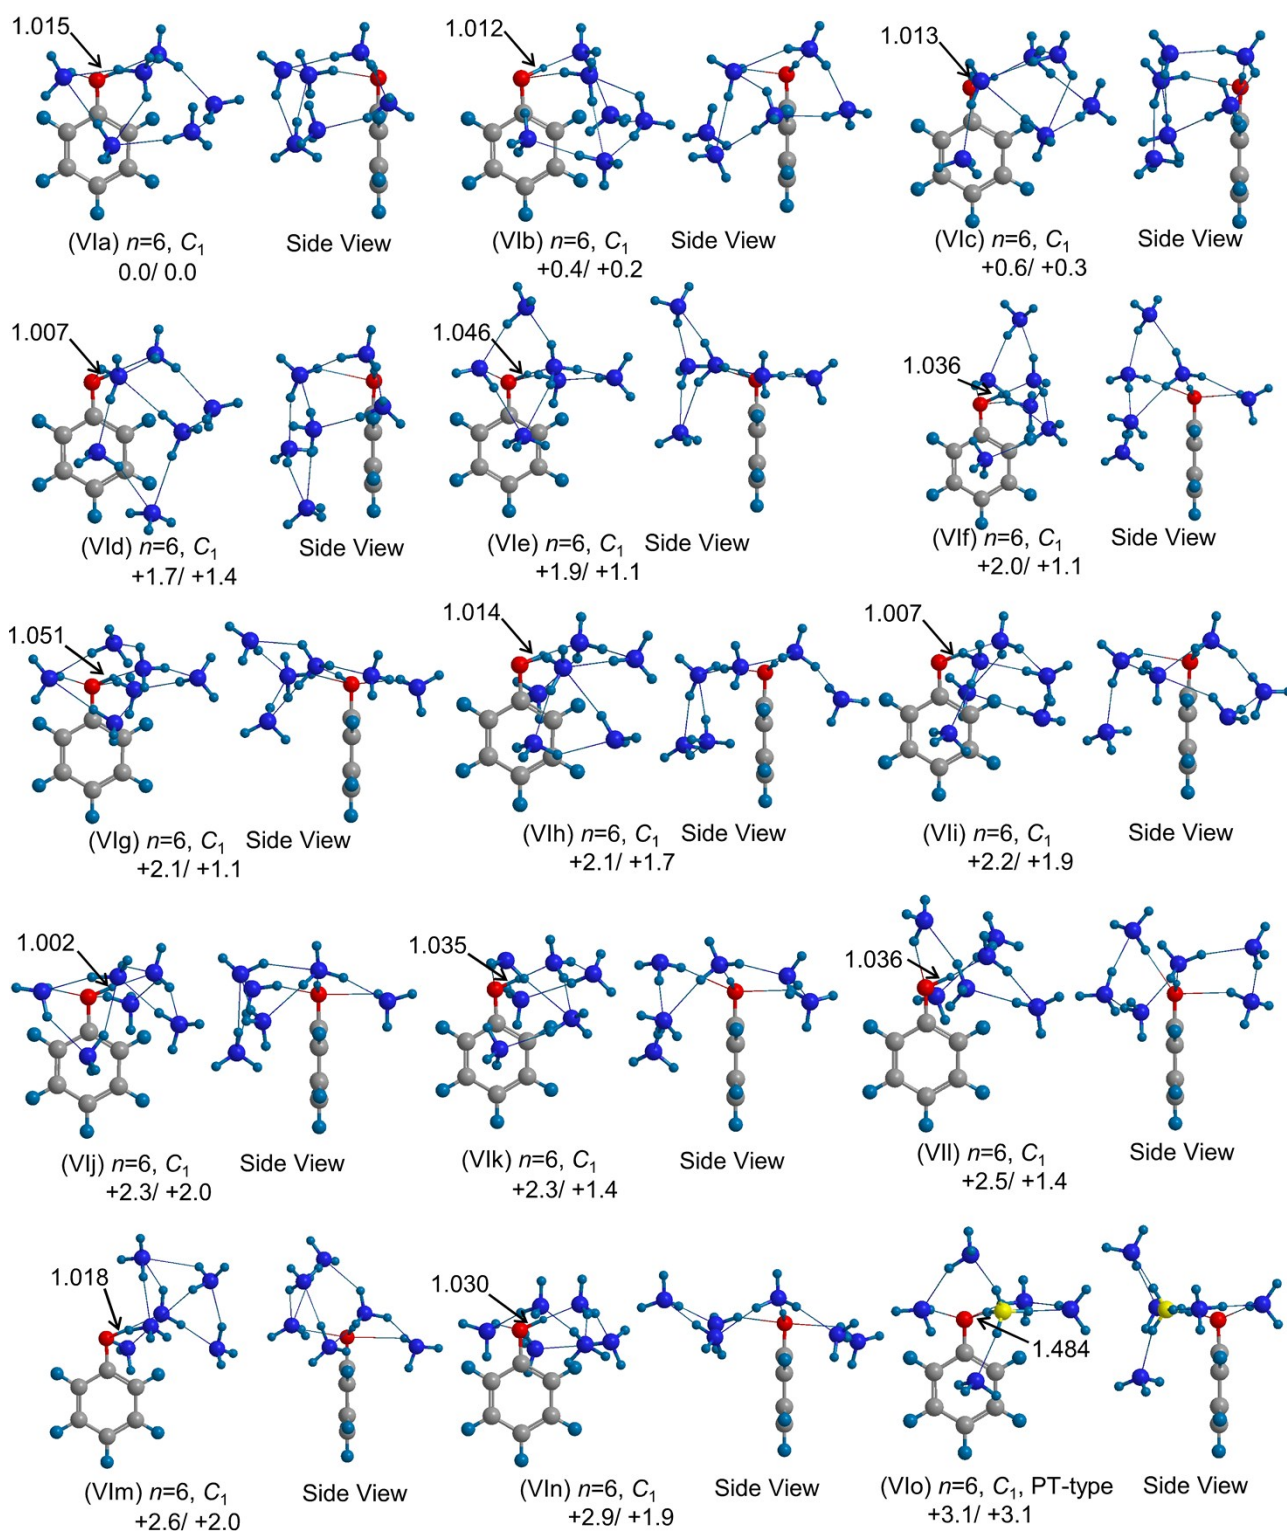

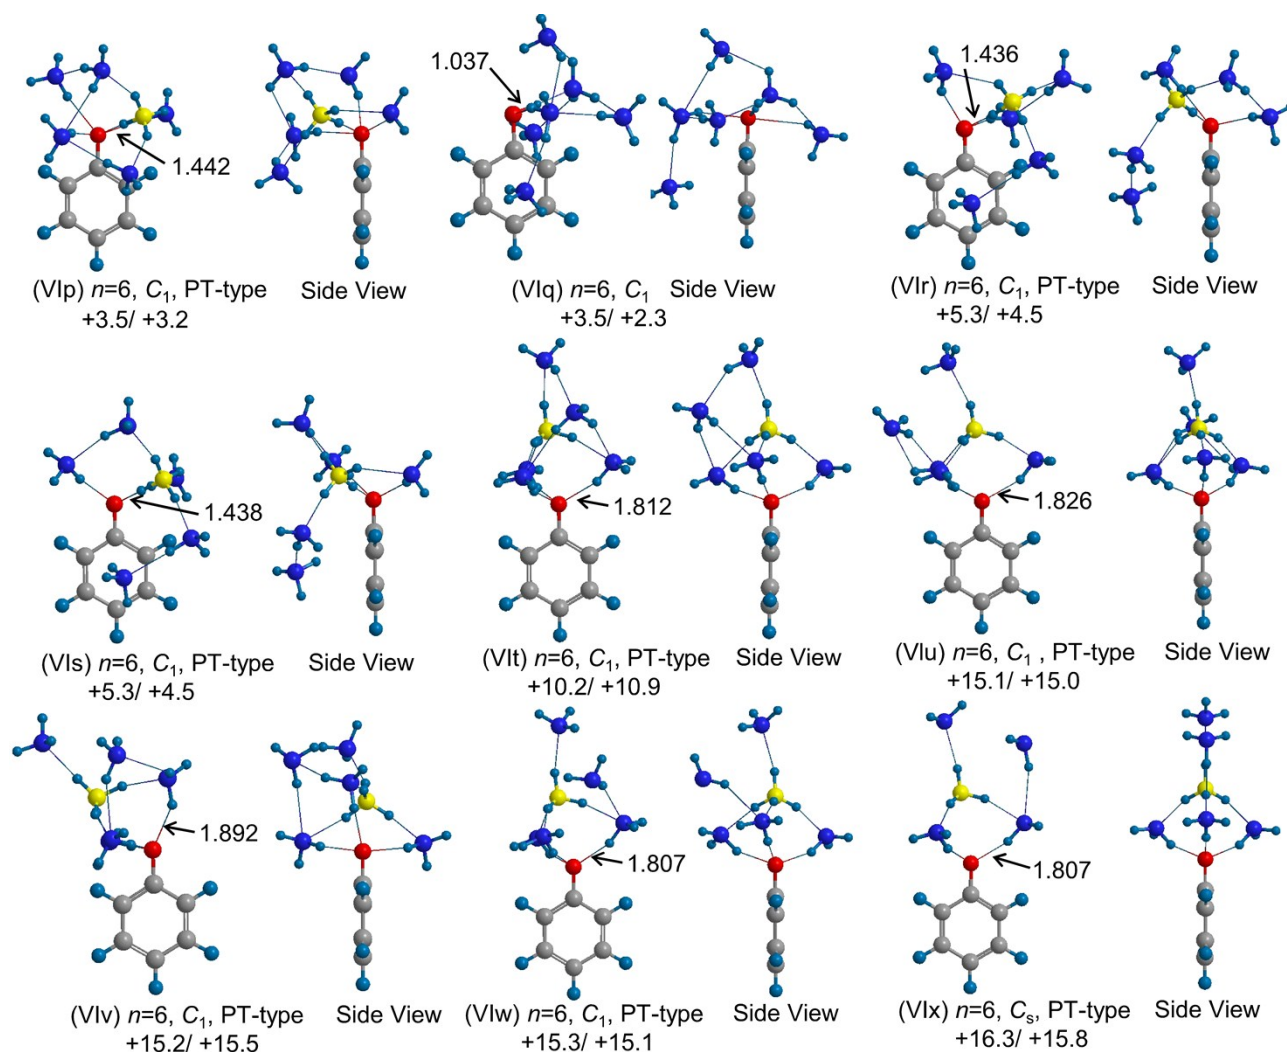

**Fig. S4** Calculated structures of  $\text{PhOH}-(\text{NH}_3)_6$  in  $S_0$  optimized at the M06-2X/cc-pVTZ level of theory. The OH distances are given in angstrom. Molecular symmetry and relative energies (kcal/mol) without and with the ZPE correction are given under each structure. The nitrogen atom of  $\text{NH}_4^+$  in the PT type structures is marked yellow to distinguish it from  $\text{NH}_3$ .

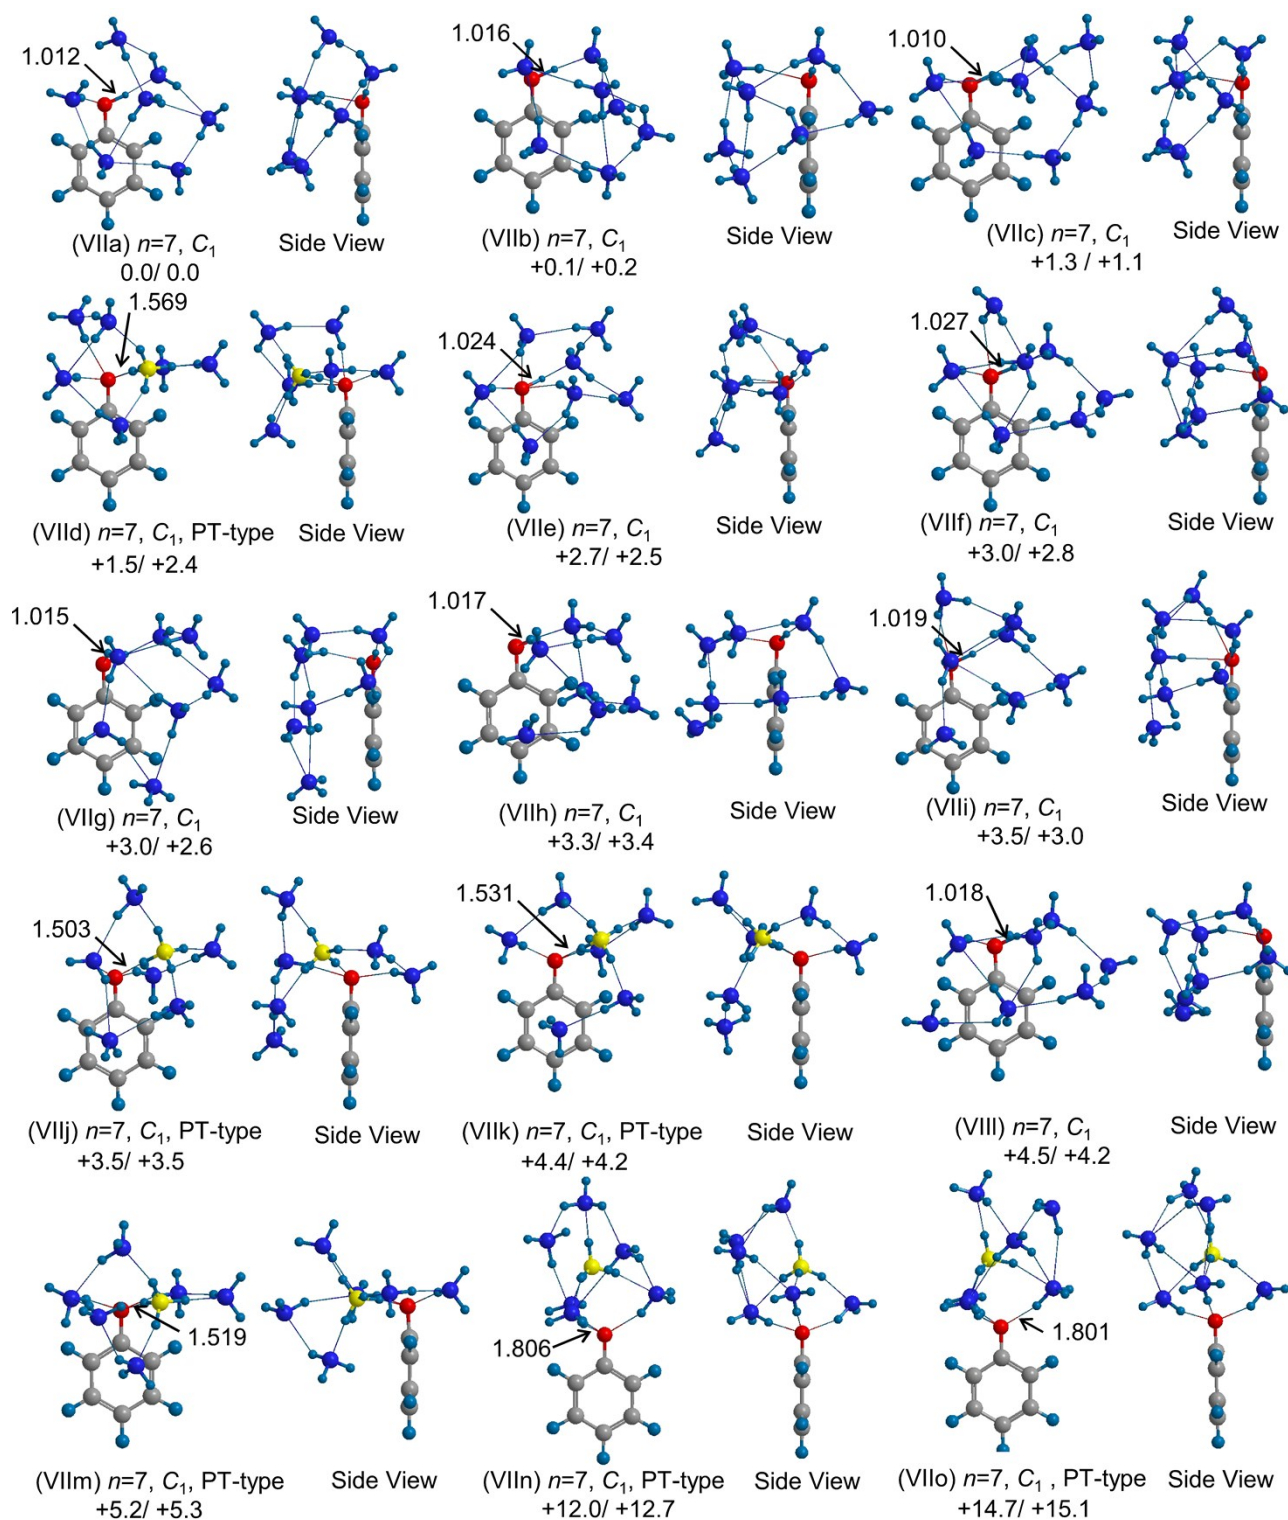

**Fig. S5** Calculated structures of  $\text{PhOH}-(\text{NH}_3)_7$  in  $S_0$  optimized at the M06-2X/cc-pVTZ level of theory. The OH distances are given in angstrom. Molecular symmetry and relative energies (kcal/mol) without and with the ZPE correction are given under each structure. The nitrogen atom of  $\text{NH}_4^+$  in the PT type structures is marked yellow to distinguish it from  $\text{NH}_3$ .



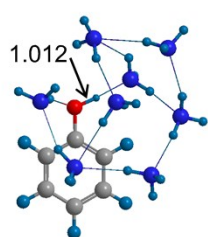

(VIIIa)  $n=8$ ,  $C_1$   
0.0/ 0.0

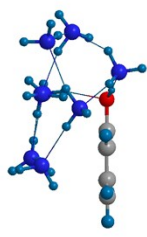

Side View

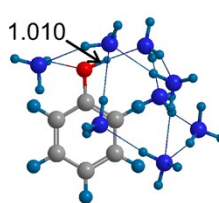

(VIIIb)  $n=8$ ,  $C_1$   
+0.5 / +0.5

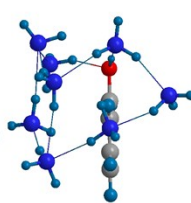

Side View

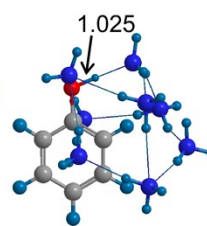

(VIIIc)  $n=8$ ,  $C_1$   
+0.5/ +0.1

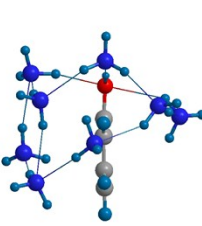

Side View

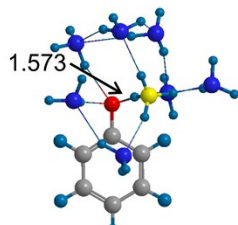

(VIId)  $n=8$ ,  $C_1$ , PT-type  
+0.6/ +1.5

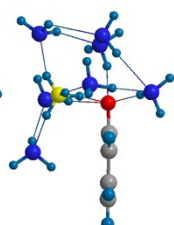

Side View

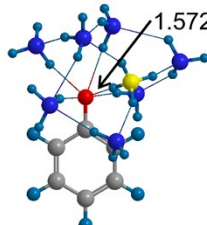

(VIIle)  $n=8$ ,  $C_1$ , PT-type  
+1.1/ +1.7

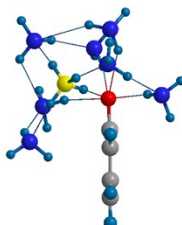

Side View

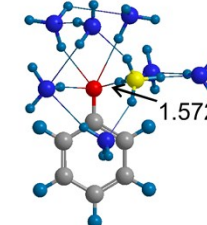

(VIIIf)  $n=8$ ,  $C_1$ , PT-type  
+1.2/ +2.1

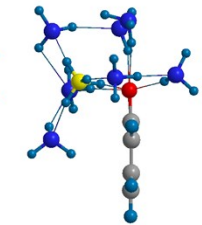

Side View

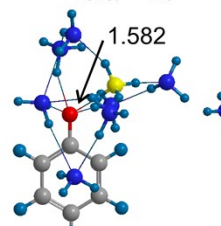

(VIIlg)  $n=8$ ,  $C_1$ , PT-type  
+1.8/ +1.9

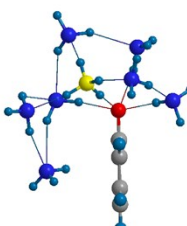

Side View

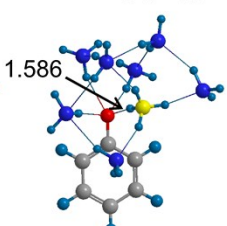

(VIIlh)  $n=8$ ,  $C_1$ , PT-type  
+1.8/ +2.3

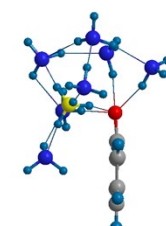

Side View

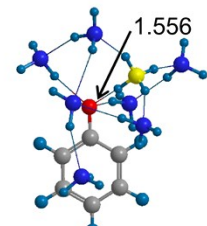

(VIIli)  $n=8$ ,  $C_1$ , PT-type  
+2.2/ +2.1

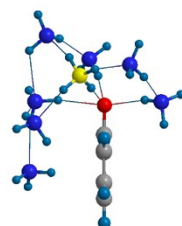

Side View

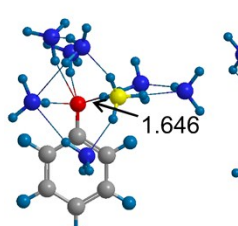

(VIIIj)  $n=8$ ,  $C_1$ , PT-type  
+2.3/ +2.8

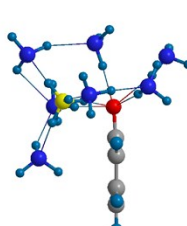

Side View

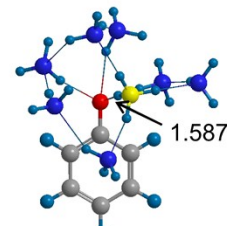

(VIIIk)  $n=8$ ,  $C_1$ , PT-type  
+2.4/ +2.5

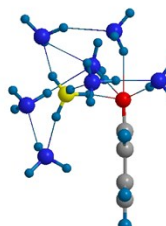

Side View

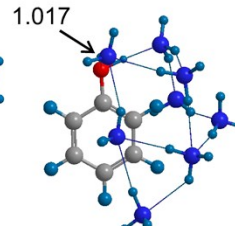

(VIIIl)  $n=8$ ,  $C_1$   
+2.4/ +2.0

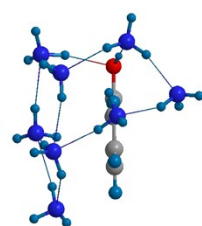

Side View

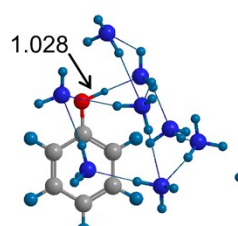

(VIIIm)  $n=8$ ,  $C_1$   
+2.4/ +1.9

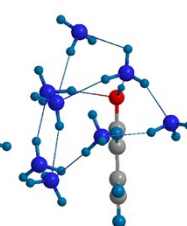

Side View

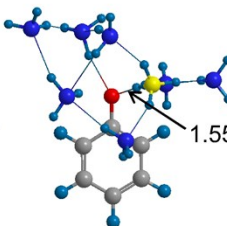

(VIIIn)  $n=8$ ,  $C_1$ , PT-type  
+2.8/ +3.2

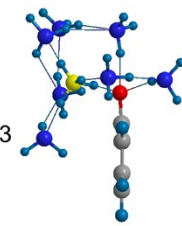

Side View

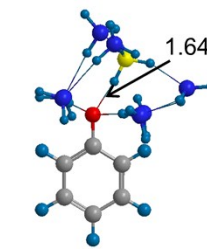

(VIIIo)  $n=8$ ,  $C_1$ , PT-type  
+3.1/ +3.6

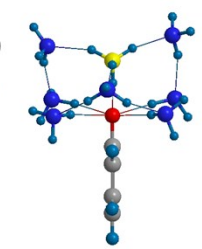

Side View

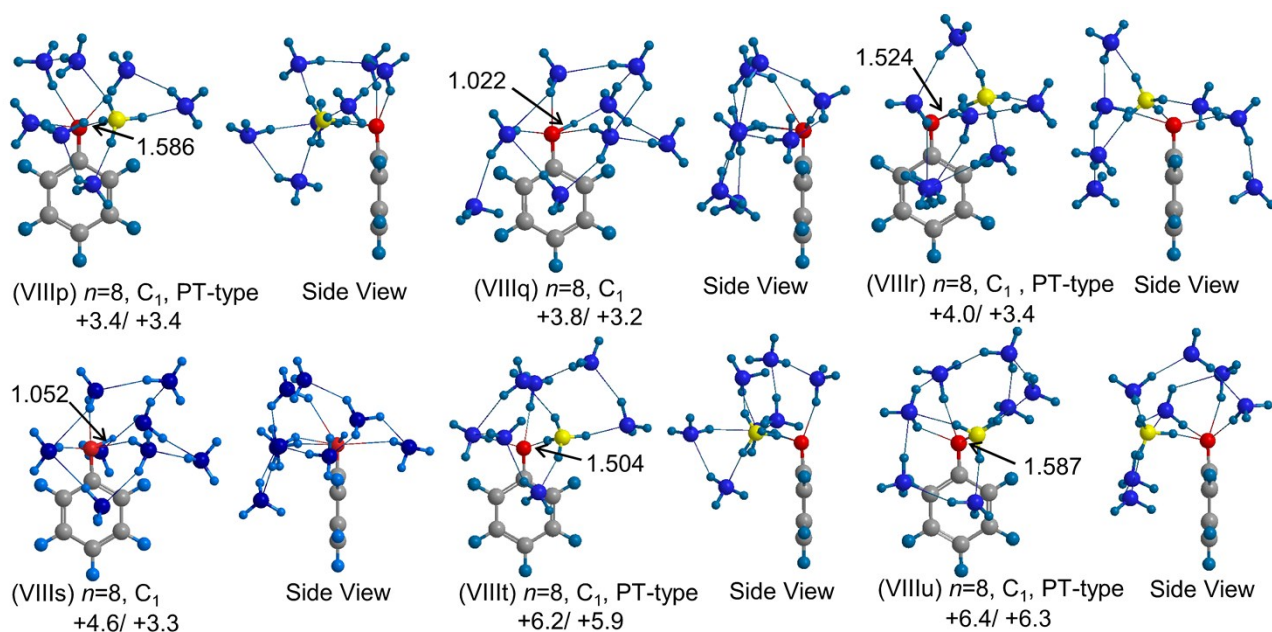

**Fig. S6** Calculated structures of  $\text{PhOH}-(\text{NH}_3)_8$  in  $S_0$  optimized at the M06-2X/cc-pVTZ level of theory. The OH distances are given in angstrom. Molecular symmetry and relative energies (kcal/mol) without and with the ZPE correction are given under each structure. The nitrogen atom of  $\text{NH}_4^+$  in the PT type structures is marked yellow to distinguish it from  $\text{NH}_3$ .

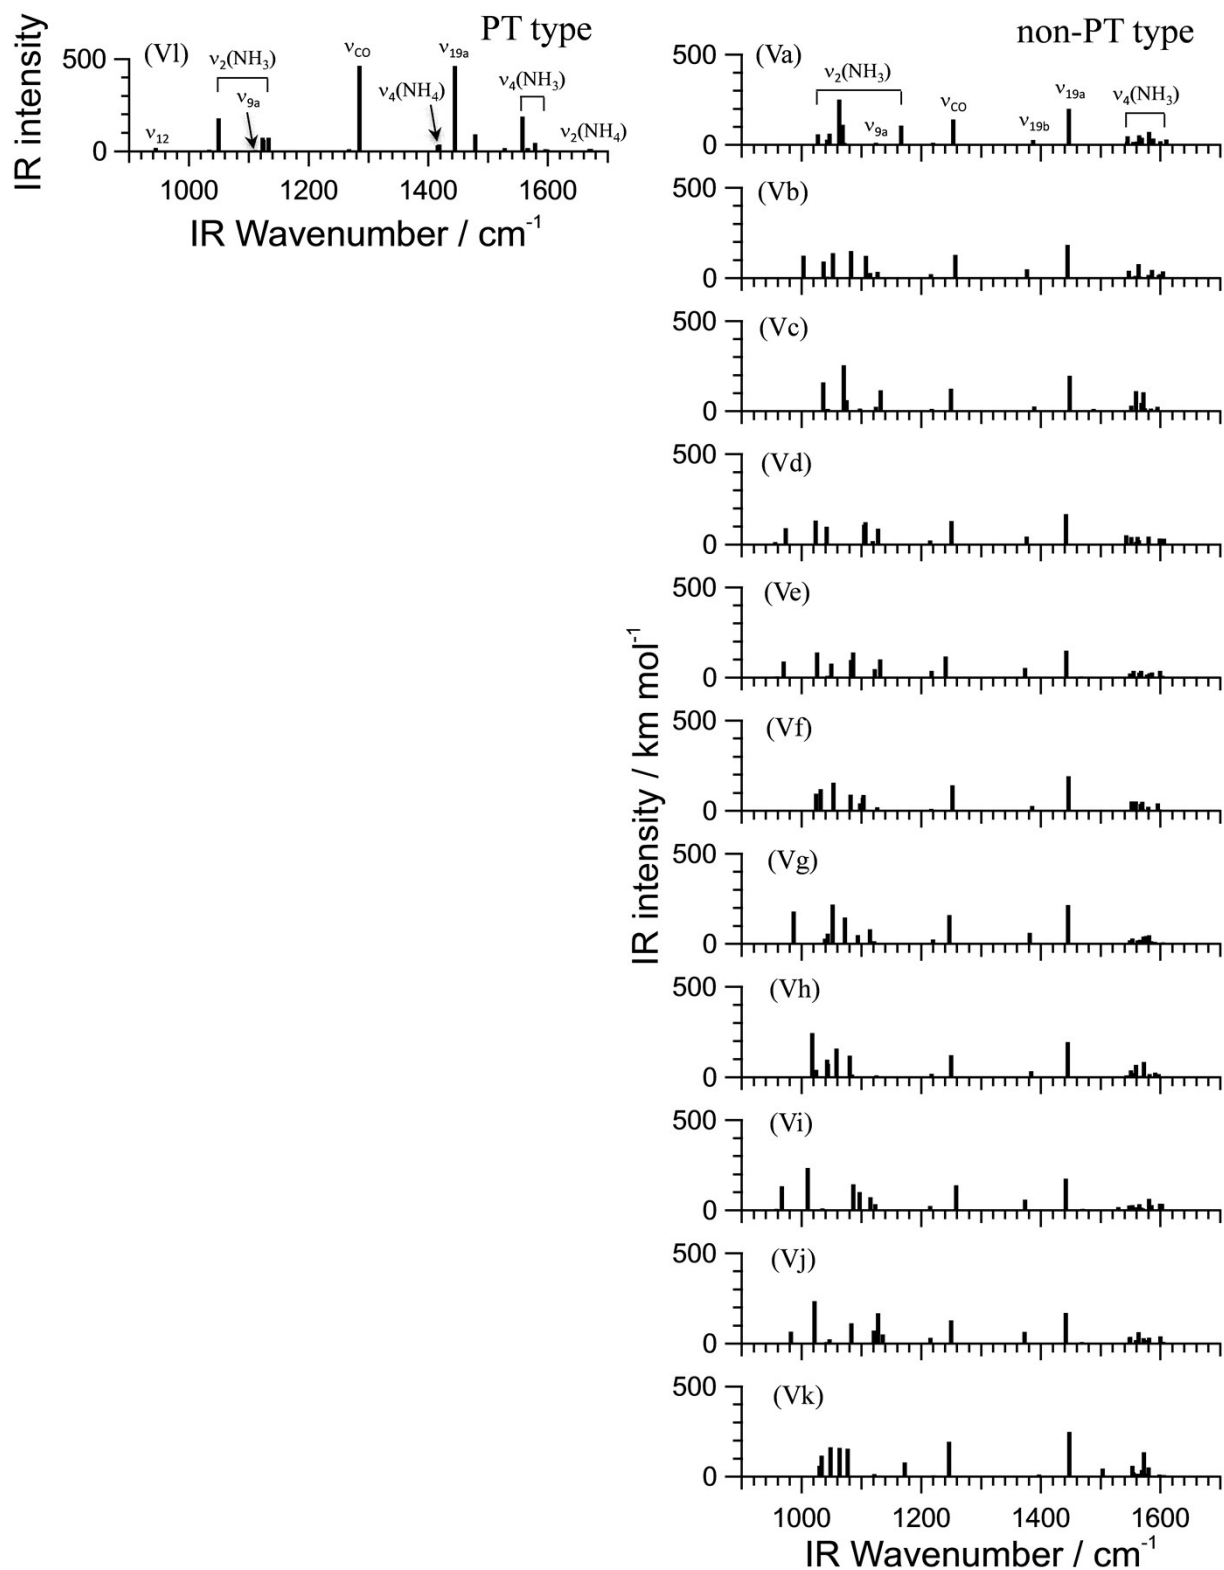

**Fig. S7** Theoretical IR spectra for the PT and non-PT type structures of  $\text{PhOH}-(\text{NH}_3)_5$  in  $S_0$  obtained at the M06-2X/cc-pVTZ level of theory. The calculated vibrational frequencies have been scaled by 0.941.

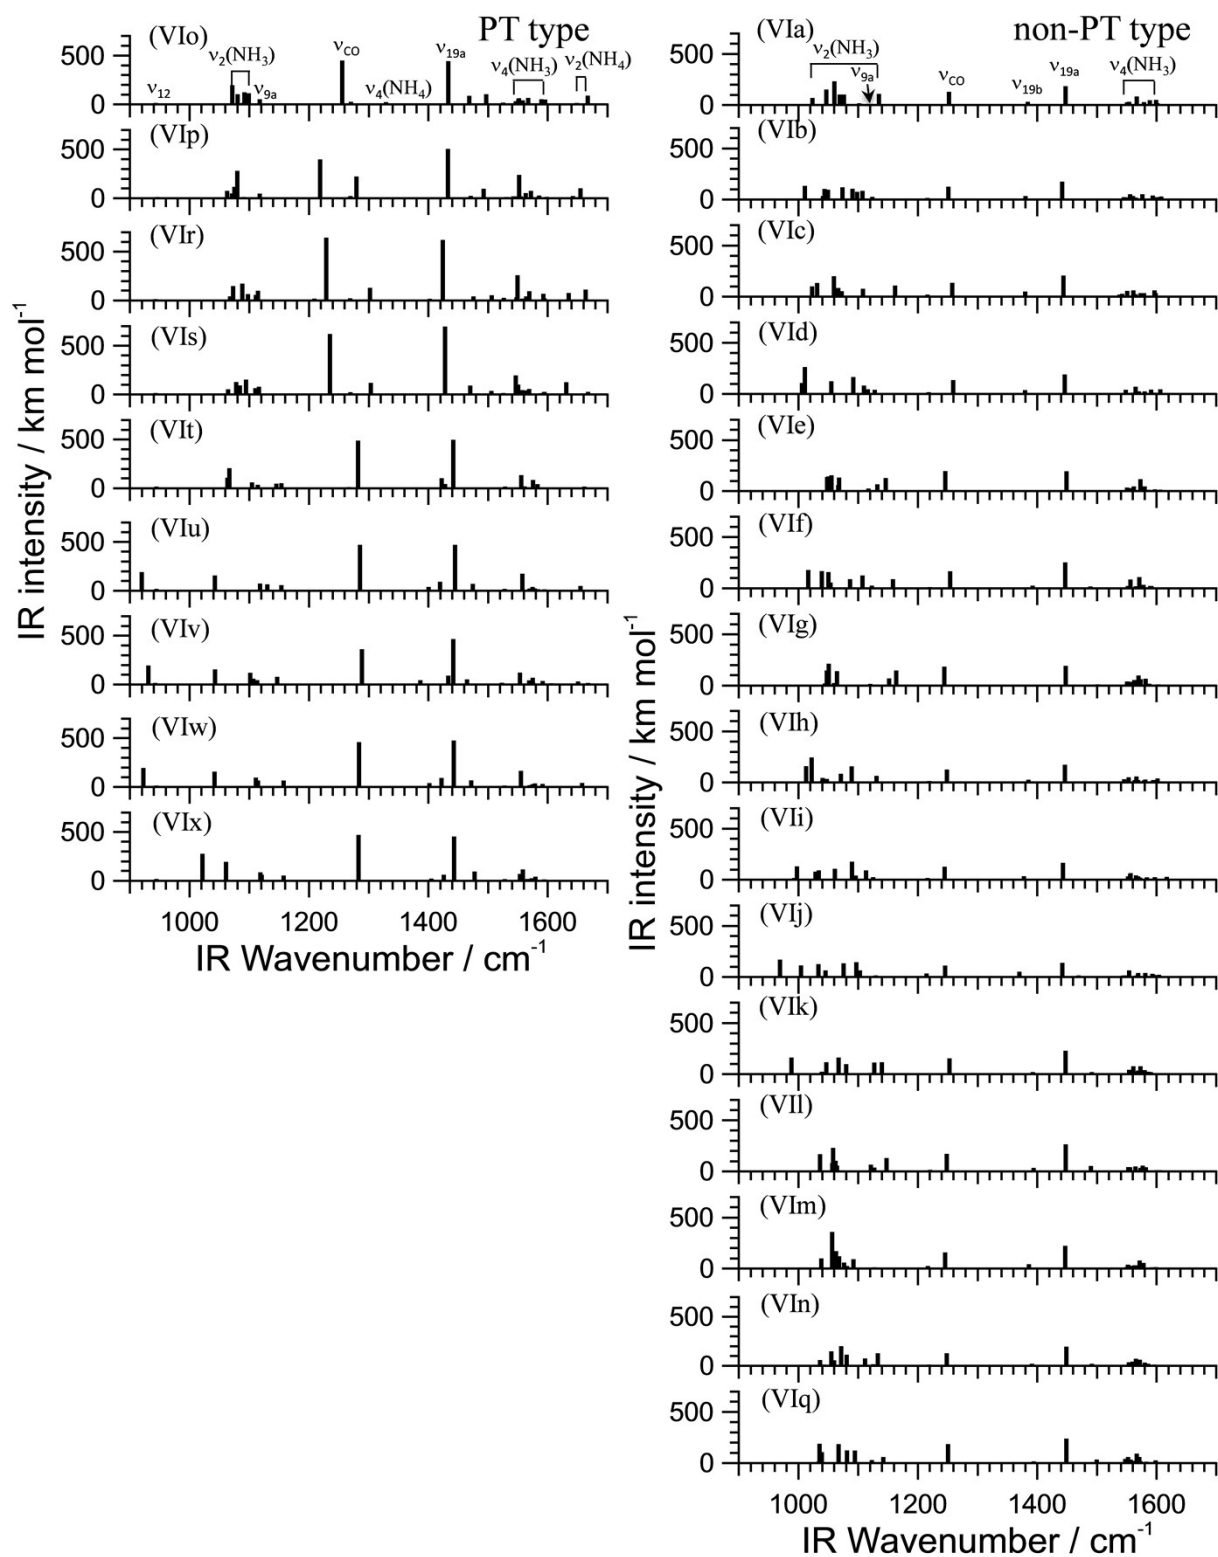

**Fig. S8** Theoretical IR spectra for the PT and non-PT type structures of  $\text{PhOH}-(\text{NH}_3)_6$  in  $S_0$  obtained at the M06-2X/cc-pVTZ level of theory. The calculated vibrational frequencies have been scaled by 0.941.

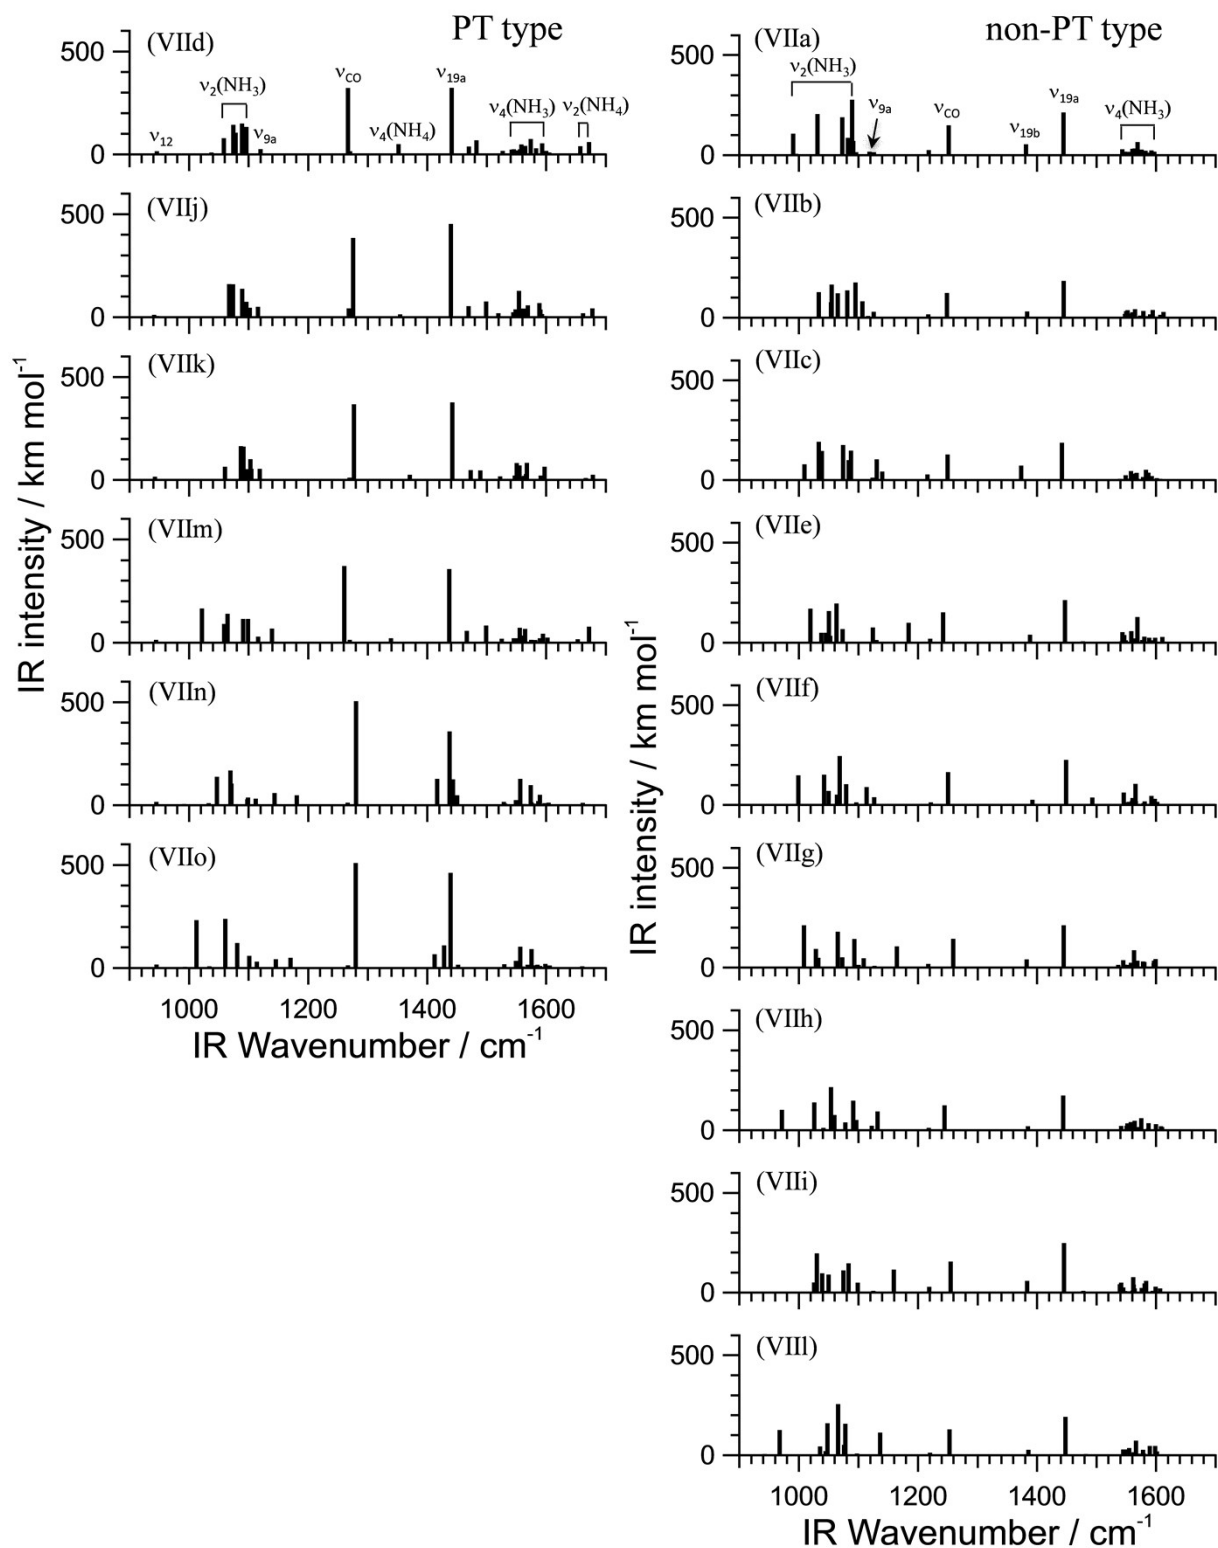

**Fig. S9** Theoretical IR spectra for the PT and non-PT type structures of  $\text{PhOH}-(\text{NH}_3)_7$  in  $S_0$  obtained at the M06-2X/cc-pVTZ level of theory. The calculated vibrational frequencies have been scaled by 0.941.



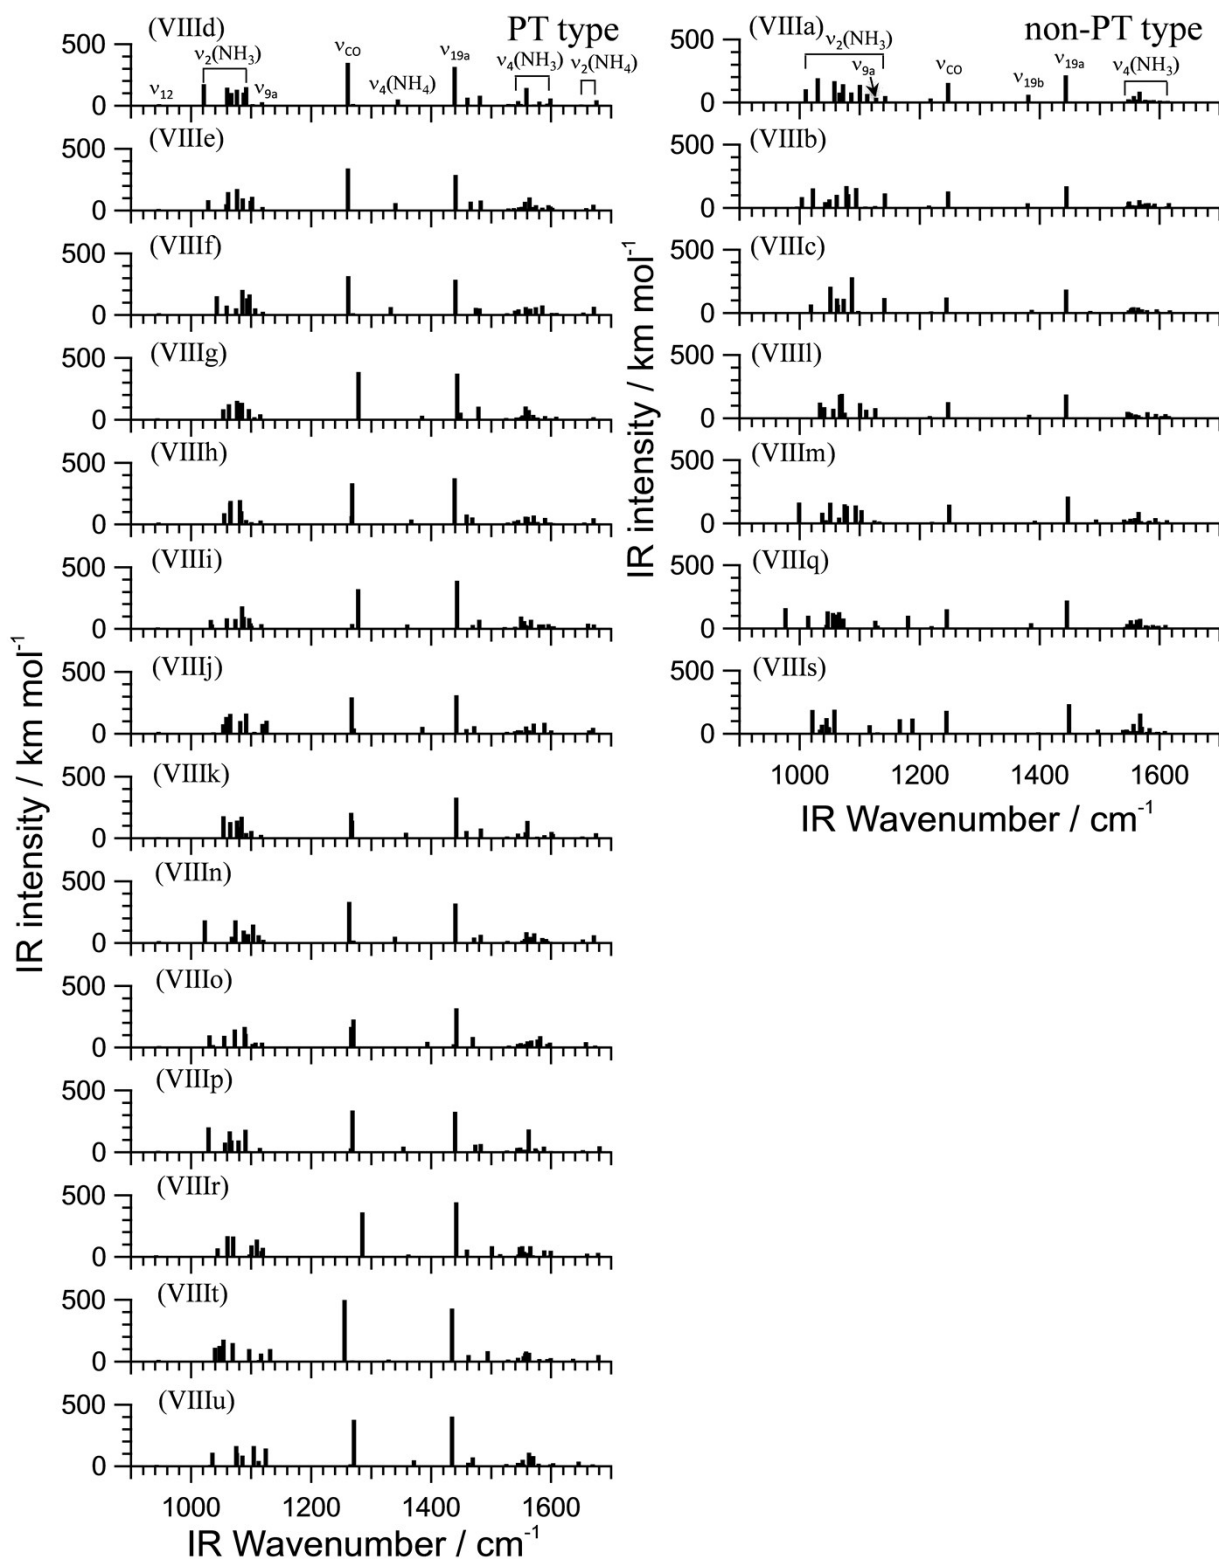

**Fig. S10** Theoretical IR spectra for the PT and non-PT type structures of  $\text{PhOH}-(\text{NH}_3)_8$  in  $S_0$  obtained at the M06-2X/cc-pVTZ level of theory. The calculated vibrational frequencies have been scaled by 0.941.

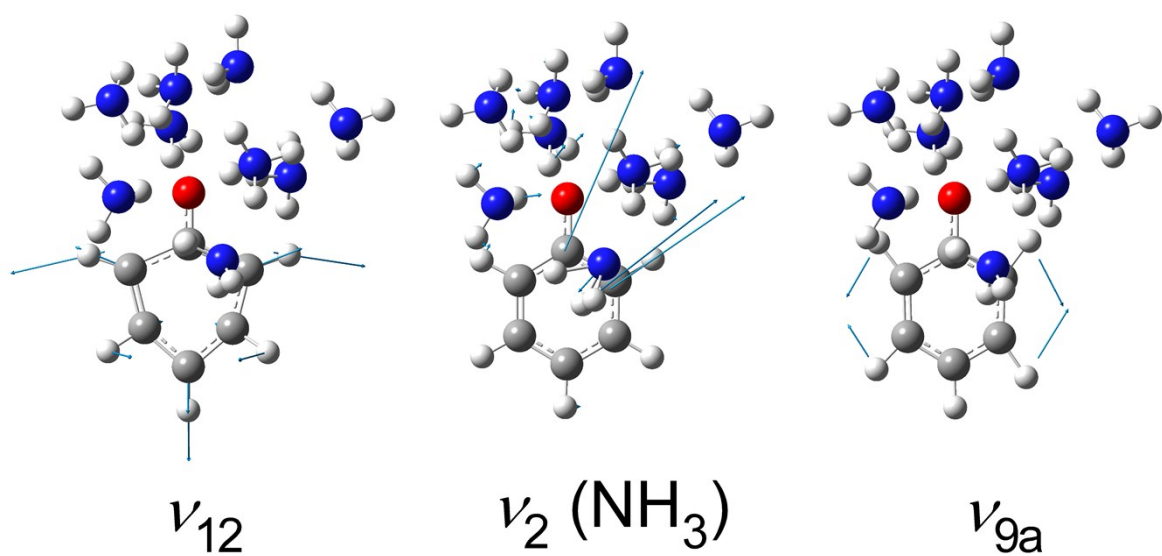

**Fig. S11** Vibrational motions of  $\nu_{12}$ ,  $\nu_2$  ( $\text{NH}_3$  moiety), and  $\nu_{9a}$  modes of the most stable isomer IXa of  $\text{PhOH}-(\text{NH}_3)_9$  in  $S_0$  calculated at the M06-2X/cc-pVTZ level.

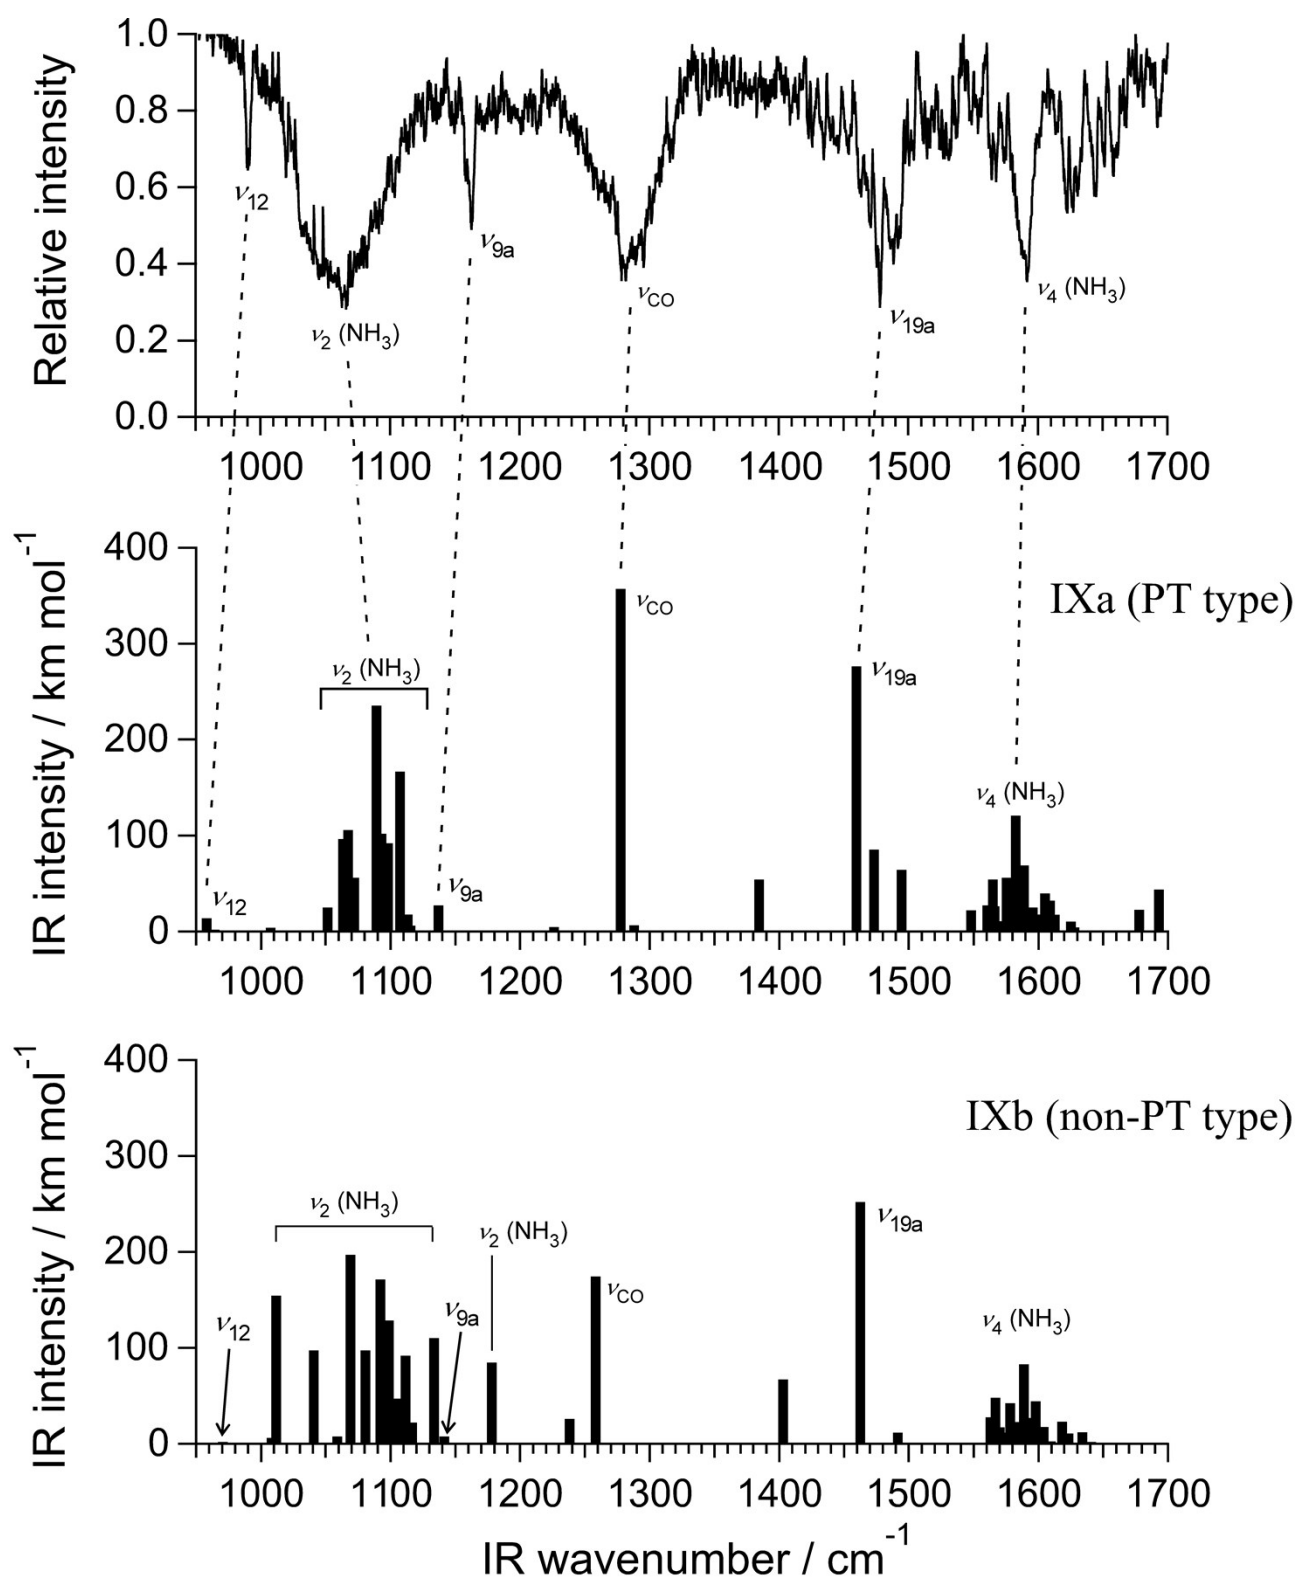

**Fig. S12** Comparison of the experimental mid-IR spectrum with that of the most stable PT type cluster IXa and non-PT type cluster IXb of  $\text{PhOH}-(\text{NH}_3)_9$  in  $S_0$  obtained at the M06-2X/cc-pVTZ level of theory. The calculated vibrational frequencies have been scaled by 0.953.
